# Supplementary material for: Exogenous plant growth regulator and foliar fertilizers for phytoextraction of cadmium with Boehmeria nivea [L.] Gaudich from contaminated field soil.
Source: Research Square preprint supplement (doi:10.21203/rs.3.rs-1197456/v1), 2022-02-25
Supplement: Supplementary file 1 [file 2b54d9ecd45b146a910a92d8.docx]

Graphical abstract

Fig 1.(a) Cd content in aboveground ramie sprayed by plant growth regulators; (b)Cd content in underground ramie sprayed by plant growth regulators; Bars marked with different letters are significantly different among treatments (P < 0.01). Values are means ± SD (n = 3). Duncan’s multiple range test.

Fig 2.Cd translocation factors in aboveground ramie sprayed by plant growth regulators; Bars marked with different letters are significantly different among treatments (P < 0.01). Values are means ± SD (n = 3). Duncan’s multiple range test.

Fig 3.(a) Cd bioconcentration factors in aboveground ramie sprayed by plant growth regulators; (b)Cd bioconcentration factors in underground ramie sprayed by plant growth regulators; Bars marked with different letters are significantly different among treatments (P < 0.01). Values are means ± SD (n = 3). Duncan’s multiple range test.

Fig 4.(a) Cd content in aboveground ramie by spraying mixed plant growth regulator and fertilizers;(b). Cd content in underground ramie by spraying mixed plant growth regulators and fertilizers; Bars marked with different letters are significantly different among treatments (P < 0.01). Values are means ± SD (n = 3). Duncan’s multiple range test.

Fig 5.Translocation factors (TFs) from underground to aboveground treated by mixed plant growth regulator and fertilizers; Bars marked with different letters are significantly different among treatments (P < 0.01). Values are means ± SD (n = 3). Duncan’s multiple range test.

Fig 6.(a) Cd bioconcentration factors in aboveground ramie by mixed plant growth regulator and fertilizers;(b). Cd bioconcentration factors in underground ramie by spraying mixed plant growth regulator and fertilizers; Bars marked with different letters are significantly different among treatments (P < 0.01). Values are means ± SD (n = 3). Duncan’s multiple range test.

Fig 7. Correlation index of relevant indicators by plant growth regulators treatments. The shades of the colors and the corresponding numbers represent correlations. The darker the blue, the greater the negative correlation, and the darker the gray, the greater the positive correlation. Pearson’s correlation coefficients were used.

Fig 8. Correlation index of relevant indicators by mixed plant growth regulator and fertilizers. The shades of the colors and the corresponding numbers represent correlations. The darker the blue, the greater the negative correlation, and the darker the gray, the greater the positive correlation. Pearson’s correlation coefficients were used.
